# Supplementary material
Source: publisher site journal article supplement (https://www.dovepress.com/article/222564)
Supplement: Supplementary file 1 [file get_supplementary_file.php]

# Supplementary File1: Primer sequence information

# 1.1 Homo sapiens Rho GTPase activating protein 10 (ARHGAP10), mRNA

NM_024605.3

Primer F 5' TTTTCTCCTCCTGCTACTG 3'

Primer R 5' CGTTCAGAGTCCCTTCTAG 3'

Pos: 2140-2317

Amplified product: Size: 178 bps

# 1.2 Homo sapiens glyceraldehyde-3-phosphate dehydrogenase (GAPDH), transcript variant 2, mRNA

NM_001256799.2

Primer F 5' AATCCCATCACCATCTTC 3'

Primer R 5' AGGCTGTTGTCATACTTC 3'

Pos: 436-653

Amplified product: Size: 218 bps

**Supplementary** **Table1: Homo sapiens Rho GTPase activating protein 10 (ARHGAP10), mRNA （NM_024605.3）RNAi targeting locus information**

| RNAi Targeting Locus | | | Sequence |
| --- | --- | --- | --- |
| Name | locus positon | |
| siARHGAP10-1 | | 918-936 | GCACAGATCTGGAGGGAAA |
| siARHGAP10-2 | | 1603-1621 | GGAGTGGTGTTTGGACCAA |
| siARHGAP10-3 | | 1857-1875 | GCTGGAAGATGGTGACAAT |

**Supplementary Table 2: The primary antibodies information**

| Antibody name | Catalog number | Source | Dilution factor |
| --- | --- | --- | --- |
| ARHGAP10 | 55139-1-AP | Proteintech，USA | 1:1000 |
| AKT | #9272 | CST, USA | 1:1000 |
| p-AKT | #9271 | CST, USA | 1:1000 |
| MMP2 | Ab97779 | Abcam, UK | 1:1000 |
| MMP9 | Ab137867 | Abcam, UK | 1:1000 |
| RHOA | Ab54835 | Abcam, UK | 1:1000 |
| GAPDH | #5174 | CST, USA | 1:2000 |
